# Supplementary material for: A review of the toxic effects of microplastics based on studies on mammals and mammalian cell lines
Source: Royal Society of Chemistry journal article supplement (doi:10.1039/d4va00227j), 2024-01-01
Supplement: d4va00227j1.pdf [file d4va00227j1.pdf]

## Supplementary Information

Table S1. Levels of polystyrene (PS), polyethylene (PE), polypropylene (PP), and other microplastics with a wide range of sizes that produce an effect or no effect on biomarkers of interest

| MP Type          | MP Characteristics                                  | Experimental Subject                             | Exposure Duration | Level with no effect                                        | Level with adverse effect                                      | Adverse Effect Observed                                              | Reference |
|------------------|-----------------------------------------------------|--------------------------------------------------|-------------------|-------------------------------------------------------------|----------------------------------------------------------------|----------------------------------------------------------------------|-----------|
| PS               | 5 $\mu\text{m}$ and 20 $\mu\text{m}$                | Mice                                             | 28 days           | -                                                           | 0.01 mg/day                                                    | Decreased adenosine triphosphate level                               | 67        |
|                  |                                                     |                                                  |                   | -                                                           | 0.01 mg/day                                                    | Increased lactate dehydrogenase                                      |           |
|                  |                                                     |                                                  |                   | -                                                           | 0.01 mg/day                                                    | Decreased total cholesterol (lipid metabolism)                       |           |
|                  |                                                     |                                                  |                   | -                                                           | 0.1 mg/day                                                     | Decreased triacylglycerol (lipid metabolism)                         |           |
|                  |                                                     |                                                  |                   | -                                                           | 0.1 mg/day                                                     | Decreased catalase (oxidative stress)                                |           |
|                  |                                                     |                                                  |                   | -                                                           | 0.1 mg/day                                                     | Increased glutathione peroxidase (oxidative stress)                  |           |
|                  |                                                     |                                                  |                   | -                                                           | 0.01 mg/day (20 $\mu\text{m}$ ); 0.1 mg/day (5 $\mu\text{m}$ ) | Increased superoxide dismutase (oxidative stress)                    |           |
|                  |                                                     |                                                  |                   | -                                                           | 0.01 mg/day                                                    | Increased acetylcholinesterase                                       |           |
|                  |                                                     |                                                  |                   | -                                                           | 0.5 mg/day                                                     | Histological – inflammation and formation of lipid droplets in liver |           |
| PS               | 0.5 $\mu\text{m}$ and 50 $\mu\text{m}$              | Mice                                             | 5 weeks           | -                                                           | 1000 $\mu\text{g/L}$ (0.5 $\mu\text{m}$ )                      | Decreased body weight                                                | 68        |
|                  |                                                     |                                                  |                   | -                                                           | 1000 $\mu\text{g/L}$                                           | Decreased relative liver and fat weights                             |           |
|                  |                                                     |                                                  |                   | -                                                           | 100 $\mu\text{g/L}$                                            | Decreased mucin secretion                                            |           |
| COOH-modified PS | 46.3 $\pm$ 6 nm (nano), 465.8 $\pm$ 10.2 nm (micro) | Caco-2/HT29-MTX-E12-culture (intestinal barrier) | 24 hours          | -                                                           | 100 $\mu\text{g/mL}$ nano-PS                                   | Increased cell viability                                             | 45        |
|                  |                                                     |                                                  |                   | 100 $\mu\text{g/mL}$ nano-PS; 100 $\mu\text{g/mL}$ micro-PS | -                                                              | Trans-epithelial electrical resistance                               |           |

|    |             |                                                    |          |                                                                                                                                                                     |                                                                                                                                                                |                                                                                                                |    |
|----|-------------|----------------------------------------------------|----------|---------------------------------------------------------------------------------------------------------------------------------------------------------------------|----------------------------------------------------------------------------------------------------------------------------------------------------------------|----------------------------------------------------------------------------------------------------------------|----|
|    |             | BeWo b30<br>(placental barrier)                    |          | -                                                                                                                                                                   | 5 µg/mL nano-PS;<br>0.01 µg/mL micro-<br>PS (dose-dependent<br>up to 10 µg/mL)                                                                                 | Increased cell viability                                                                                       |    |
|    |             |                                                    |          | 100 µg/mL nano-<br>PS; 100 µg/mL<br>micro-PS                                                                                                                        | -                                                                                                                                                              | Trans-epithelial electrical<br>resistance                                                                      |    |
|    |             | NIH/3T3 fibroblasts<br>(embryotoxicity)            |          | 100 µg/mL nano-<br>PS;                                                                                                                                              | 12.6 µg/mL micro-<br>PS                                                                                                                                        | Cytotoxicity (IC <sub>50</sub> – 50%<br>inhibition of cell growth)                                             |    |
|    |             | Mouse ES-D3<br>(embryotoxicity)                    |          | 100 µg/mL nano-<br>PS                                                                                                                                               | 12.6 µg/mL micro-<br>PS                                                                                                                                        | Cytotoxicity (IC <sub>50</sub> )                                                                               |    |
|    |             | Cardiomyocytes                                     |          | -                                                                                                                                                                   | 89.9 µg/mL nano-PS;<br>0.1 µg/mL micro-PS                                                                                                                      | Cytotoxicity (ID <sub>50</sub> – 50%<br>inhibition of cell<br>differentiation)                                 |    |
|    |             | HepG2CDKN1A<br>-DsRed biosensor<br>cells           | 5 days   | 50 µg/mL nano-<br>PS; 10 µg/mL<br>micro-PS                                                                                                                          | -                                                                                                                                                              | Genotoxicity – p53<br>expression                                                                               |    |
|    |             | CHO-K1 cells                                       | 24 hours | 100 µg/mL nano-<br>PS; 100 µg/mL<br>micro-PS                                                                                                                        | -                                                                                                                                                              | Genotoxicity –<br>micronuclei formation                                                                        |    |
| PS | 1, 4, 10 µm | Human intestinal<br>epithelial cell line<br>Caco-2 | 48 hours |                                                                                                                                                                     | 1 x 10 <sup>7</sup> particles/mL<br>or 1 x 10 <sup>7</sup> pg/mL (1<br>µm)<br><br>1.5 x 10 <sup>7</sup><br>particles/mL or 1 x<br>10 <sup>9</sup> pg/mL (4 µm) | Loss of cell viability                                                                                         | 57 |
|    |             | Mice                                               | 28 days  | Mixture of 4.55 x<br>10 <sup>7</sup> particles (1<br>µm & 4 µm<br>respectively) and<br>1.49 x 10 <sup>6</sup><br>particles (10 µm)<br>at a volume of 10<br>mL/kg-bw | -                                                                                                                                                              | No significant changes in<br>the weights of body and<br>organ (heart, kidney, liver,<br>lungs, spleen, testes) |    |
|    |             |                                                    |          | As above                                                                                                                                                            | -                                                                                                                                                              | No significant change of β-<br>galactosidase reporter<br>activity                                              |    |
|    |             |                                                    |          | As above                                                                                                                                                            | -                                                                                                                                                              | heme oxygenase 1-<br>dependent reporter was not                                                                |    |

|                                                                                                                    |                                                             |                                                                                                          |                 |                                                                                                                                                                                                                                                                                   |                                                                                                                   |                                                                                       |    |
|--------------------------------------------------------------------------------------------------------------------|-------------------------------------------------------------|----------------------------------------------------------------------------------------------------------|-----------------|-----------------------------------------------------------------------------------------------------------------------------------------------------------------------------------------------------------------------------------------------------------------------------------|-------------------------------------------------------------------------------------------------------------------|---------------------------------------------------------------------------------------|----|
| PS                                                                                                                 | 0.1 $\mu\text{m}$ , 5 $\mu\text{m}$                         | Caco-2 cells                                                                                             | 12 hours        | -                                                                                                                                                                                                                                                                                 | 200 $\mu\text{g}/\text{mL}$                                                                                       | observed to be induced<br>Increased intracellular ROS                                 | 43 |
|                                                                                                                    |                                                             |                                                                                                          |                 | -                                                                                                                                                                                                                                                                                 | $\geq 20$ $\mu\text{g}/\text{mL}$ (0.1 $\mu\text{m}$ )<br>and $\geq 1$ $\mu\text{g}/\text{ml}$ (5 $\mu\text{m}$ ) | Mitochondrial depolarization                                                          |    |
|                                                                                                                    |                                                             |                                                                                                          |                 | 80 $\mu\text{g}/\text{ml}$                                                                                                                                                                                                                                                        | -                                                                                                                 | No significant change in plasma membrane integrity and fluidity                       |    |
| PE                                                                                                                 | 10-150 $\mu\text{m}$                                        | C57BL/6 mice model                                                                                       | 5 weeks         | -                                                                                                                                                                                                                                                                                 | 600 $\mu\text{g}$                                                                                                 | Intestinal inflammation                                                               | 53 |
| PS                                                                                                                 | 500 nm, 1 $\mu\text{m}$ , 3 $\mu\text{m}$ , 6 $\mu\text{m}$ | Caco-2 cells                                                                                             | 24 hours        | -                                                                                                                                                                                                                                                                                 | 120 $\mu\text{g}/\text{mL}$ (mixture of different particle sizes)                                                 | Increased intracellular ROS                                                           | 72 |
|                                                                                                                    |                                                             |                                                                                                          |                 | -                                                                                                                                                                                                                                                                                 | 120 $\mu\text{g}/\text{mL}$ (300 nm, 500 nm, 1 $\mu\text{m}$ , 3 $\mu\text{m}$ and 6 $\mu\text{m}$ respectively)  | Mitochondrial depolarization (more pronounced for larger MPs)                         |    |
| MPs (PP_Sun, polyamide6 and thermoplastic polyurethane ester) resembling those released from tires and polyolefins | 50-500 $\mu\text{m}$                                        | 3-dimensional in-vitro intestinal model comprising Caco-2, HT29-MTX-E12, macrophages and dendritic cells | 6, 24 and 48 h  | Hardened polyurethane (1263.25 $\mu\text{g}/\text{cm}^2$ ); tire rubber (1066.00 $\mu\text{g}/\text{cm}^2$ ); PP_Sun (1305.50 $\mu\text{g}/\text{cm}^2$ ); Polyamide6 (1028.58 $\mu\text{g}/\text{cm}^2$ ); Thermoplastic polyurethane ester (1098.02 $\mu\text{g}/\text{cm}^2$ ) | -                                                                                                                 | Release of lactate dehydrogenase due to cell membrane rupture                         | 39 |
|                                                                                                                    |                                                             |                                                                                                          |                 | -                                                                                                                                                                                                                                                                                 | -                                                                                                                 | Release of cytokines IL-8, TNF $\alpha$ and IL-1 $\beta$ due to inflammatory response |    |
| PS                                                                                                                 | 0.05-0.1 $\mu\text{m}$                                      | Caco-2/HT29 intestinal cells and Caco-2/HT29 + Raji-B cells                                              | 24 hours        | 200 $\mu\text{g}/\text{mL}$                                                                                                                                                                                                                                                       | -                                                                                                                 | Cytotoxicity                                                                          | 50 |
|                                                                                                                    |                                                             |                                                                                                          |                 | 100 $\mu\text{g}/\text{mL}$                                                                                                                                                                                                                                                       | -                                                                                                                 | Barrier's integrity                                                                   |    |
|                                                                                                                    |                                                             |                                                                                                          |                 | 100 $\mu\text{g}/\text{mL}$                                                                                                                                                                                                                                                       | -                                                                                                                 | Barrier's permeability                                                                |    |
|                                                                                                                    |                                                             |                                                                                                          |                 | 100 $\mu\text{g}/\text{mL}$                                                                                                                                                                                                                                                       | -                                                                                                                 | Production of intracellular ROS                                                       |    |
|                                                                                                                    |                                                             |                                                                                                          |                 | 100 $\mu\text{g}/\text{mL}$                                                                                                                                                                                                                                                       | -                                                                                                                 | Genotoxic and oxidative DNA damage                                                    |    |
| PS                                                                                                                 | 0.05-0.1 $\mu\text{m}$                                      | Caco-2 cells                                                                                             | 24 and 48 hours | 150 $\mu\text{g}/\text{mL}$ (48                                                                                                                                                                                                                                                   | 200 $\mu\text{g}/\text{mL}$ (24 and                                                                               | Mild cytotoxicity                                                                     | 36 |

|                                                                |               |              |          |                                     |                                                                                                       |                                                                                                          |    |
|----------------------------------------------------------------|---------------|--------------|----------|-------------------------------------|-------------------------------------------------------------------------------------------------------|----------------------------------------------------------------------------------------------------------|----|
|                                                                |               |              |          | hours)                              | 48 hours)                                                                                             |                                                                                                          |    |
|                                                                |               |              |          | 100 µg/mL (24 hours)                | -                                                                                                     | Intracellular ROS levels                                                                                 |    |
|                                                                |               |              |          | 100 µg/mL (24 hours)                | -                                                                                                     | Genotoxic and oxidative DNA damage                                                                       |    |
|                                                                |               |              |          | 100 µg/mL (48 hours)                | -                                                                                                     | Chromosome damage (micronucleus induction)                                                               |    |
|                                                                |               |              |          | -                                   | 50 µg/mL (24 hours); 25 µg/mL (48 hours)                                                              | Increased expression of ROS-related genes, HO1                                                           |    |
| PS (original and transformed by an in-vitro digestive process) | 100 nm, 5 µm  | Caco-2 cells | 96 hours | 20 µg/mL (100 nm and 5 µm t-PS-MPs) | 20 µg/mL (100 nm PS-MPs)                                                                              | Increased lactate dehydrogenase                                                                          | 37 |
|                                                                |               |              |          | 20 µg/mL (100 nm and 5 µm t-PS-MPs) | 20 µg/mL (100 nm PS-MPs)                                                                              | Decreased intestinal transport indicated by increased permeability of paracellular marker Lucifer Yellow |    |
|                                                                |               |              |          | -                                   | 20 µg/mL (100 nm PS-MPs); 1 µg/mL (5 µm PS-MPs); 20 µg/mL (100 nm t-PS-MPs); 1 µg/mL (5 µm t-PS-MPs)  | Down-regulated adenosine triphosphate binding cassette transporters, ABCC2                               |    |
|                                                                |               |              |          | -                                   | 20 µg/mL (100 nm PS-MPs); 1 µg/mL (5 µm PS-MPs); 20 µg/mL (100 nm t-PS-MPs); 20 µg/mL (5 µm t-PS-MPs) | Down-regulated adenosine triphosphate binding cassette transporters, ABCG2                               |    |
| PS                                                             | 20 nm         | Rats         | 24 hours | -                                   | Intratracheal instillation of 2.64 x 10 <sup>14</sup> particles                                       | Lower fetal and placenta weights                                                                         | 54 |
| PE                                                             | 16.9 ± 1.9 µm | Mice         | 90 days  | -                                   | 0.125 mg/day                                                                                          | Lesions in lung tissues                                                                                  |    |
|                                                                |               |              |          | -                                   | 0.125 mg/day (male)                                                                                   | Lesions in kidney tissues                                                                                |    |
|                                                                |               |              |          | -                                   | 0.5 mg/day (female)                                                                                   | Lesions in spleen tissues                                                                                |    |
|                                                                |               |              |          | -                                   | 0.5 mg/day                                                                                            | Lesions in testicular tubules                                                                            |    |
|                                                                |               |              |          | -                                   | 0.125 mg/day (male)                                                                                   | Germ cell degeneration                                                                                   |    |
|                                                                |               |              |          | -                                   | 0.125 mg/day                                                                                          | Lesions in stomach tissues                                                                               |    |

|    |          |      |         |                                  |                                        |                                                                                                         |    |
|----|----------|------|---------|----------------------------------|----------------------------------------|---------------------------------------------------------------------------------------------------------|----|
|    |          |      |         | -                                | 0.125 mg/day (female)                  | Adverse changes in the ovary                                                                            |    |
|    |          |      |         | 2 mg/day                         | -                                      | No remarkable changes of epididymitis, heart, duodenum, ileum, colon, thymus, uterus, and brain tissues |    |
|    |          |      |         | -                                | 0.125 mg/day                           | Increased helper T cells                                                                                |    |
|    |          |      |         | -                                | 0.125 mg/day                           | Decreased number of live births per dam and                                                             |    |
|    |          |      |         | -                                | 2 mg/day                               | Decreased body weight of pups (within 6 hours after birth)                                              |    |
| PE | 40-48 µm | Mice | 90 days | -                                | 0.5 mg/day (15 mg/kg-bw/day) (P ≤ 0.5) | Increased ratio of helper T cells to cytotoxic T cells (CD4 <sup>+</sup> /CD8 <sup>+</sup> )            | 64 |
|    |          |      |         | -                                | 2 mg/day (60 mg/kg-bw/day) (P ≤ 0.05)  | Decreased ratio of mature dendritic cells (CD11b <sup>-</sup> /CD11c <sup>+</sup> )                     |    |
|    |          |      |         | -                                | 2 mg/day (60 mg/kg-bw/day)             | Increased IgA concentration                                                                             |    |
|    |          |      |         | -                                | 2 mg/day (60 mg/kg-bw/day) (P ≤ 0.5)   | Reduced number of live births per dam                                                                   |    |
|    |          |      |         | -                                | 2 mg/day (60 mg/kg-bw/day) (P ≤ 0.5)   | Reduced body weight of pups (within 6 hours after birth)                                                |    |
|    |          |      |         | -                                | 0.125 mg/day (3.75 mg/kg-bw/day)       | Pathological – degenerated testicular germ cell                                                         |    |
|    |          |      |         | -                                | 0.125 mg/day (3.75 mg/kg-bw/day)       | Pathological – stomach mucosal hypertrophy/hyperplasia                                                  |    |
|    |          |      |         | -                                | 0.125 mg/day (3.75 mg/kg-bw/day)       | Pathological – ovary cysts                                                                              |    |
|    |          |      |         | 0.125 mg/day (3.75 mg/kg-bw/day) | -                                      | Pathological – heart, intestinal, uterine and brain tissues                                             |    |
|    |          |      |         | -                                | 0.5 mg/day (15 mg/kg-bw/day)           | Pathological – spleen extramedullary hemopoiesis                                                        |    |

|    |                                           |                                                                      |         |   |                                                                       |                                                                                                      |    |
|----|-------------------------------------------|----------------------------------------------------------------------|---------|---|-----------------------------------------------------------------------|------------------------------------------------------------------------------------------------------|----|
|    |                                           |                                                                      |         | - | 0.125 mg/day (3.75 mg/kg-bw/day)                                      | Pathological – lung and kidney tissues                                                               |    |
| PS | 5.0-5.9 $\mu\text{m}$                     | Mice                                                                 | 42 days | - | 0.01 mg/day                                                           | Decreased spermatogenic cells                                                                        | 69 |
|    |                                           |                                                                      |         | - | 0.01 mg/day                                                           | Decreased sperm count                                                                                |    |
|    |                                           |                                                                      |         | - | 0.01 mg/day                                                           | Increased rate of teratosperm                                                                        |    |
|    |                                           |                                                                      |         | - | 0.1 mg/day                                                            | Reduced succinate dehydrogenase activities                                                           |    |
|    |                                           |                                                                      |         | - | 0.01 mg/day (not dose-dependent; no significant effect at 0.1 mg/day) | Reduced lactate dehydrogenase activities                                                             |    |
|    |                                           |                                                                      |         | - | 0.01 mg/day                                                           | Decreased testosterone level                                                                         |    |
|    |                                           |                                                                      |         | - | 0.01 mg/day                                                           | Increased ROS                                                                                        |    |
|    |                                           |                                                                      |         | - | 0.01 mg/day                                                           | Increased malondialdehyde                                                                            |    |
|    |                                           |                                                                      |         | - | 1 mg/day                                                              | Decreased glutathione                                                                                |    |
|    |                                           |                                                                      |         | - | 0.01 mg/day                                                           | Increased apoptotic factor, Casp-3                                                                   |    |
| -  | 0.01 mg/day                               | Increased inflammatory factors TNF- $\alpha$ , IL-1 $\beta$ and IL-6 |         |   |                                                                       |                                                                                                      |    |
| PE | 35.46 $\mu\text{m} \pm 18.17 \mu\text{m}$ | Mice                                                                 | 7 days  | - | 60 mg/L or $4.24 \times 10^6$ particles/ $\text{m}^3$                 | Reduced locomotion activity, i.e. shorter distance traveled, lower speed and higher anxiety index    | 74 |
| PS | 0.5 $\mu\text{m}$                         | Rats                                                                 | 90 days | - | 1.5 mg/day                                                            | Decreased volume of growing follicle                                                                 | 38 |
|    |                                           |                                                                      |         | - | 0.15 mg/day                                                           | Reduced secretion of anti-Mullerian hormone                                                          |    |
|    |                                           |                                                                      |         | - | 0.15 mg/day                                                           | Increased malondialdehyde level; decreased catalase, superoxide dismutase and glutathione peroxidase |    |
|    |                                           |                                                                      |         | - | 1.5 mg/day                                                            | Decreased integrated optical density value of collagen fibers; increased                             |    |

|                                         |                                    |                                                                                                       |          |                                                              |                                                            |                                                                                                                        |    |
|-----------------------------------------|------------------------------------|-------------------------------------------------------------------------------------------------------|----------|--------------------------------------------------------------|------------------------------------------------------------|------------------------------------------------------------------------------------------------------------------------|----|
|                                         |                                    |                                                                                                       |          |                                                              |                                                            | fibronectin expression                                                                                                 |    |
|                                         |                                    |                                                                                                       |          | -                                                            | 0.15 mg/day                                                | Increased expressions of Wnt and TGF- $\beta$ in ovarian tissues                                                       |    |
|                                         |                                    |                                                                                                       |          | -                                                            | 1.5 mg/day                                                 | Increased expressions of $\beta$ -catenin, p- $\beta$ -catenin, $\alpha$ -SMA, collagen I, collagen II and fibronectin |    |
|                                         |                                    | Rat granulosa cells                                                                                   | 24 hours | -                                                            | 5 $\mu$ g/mL                                               | Increased reactive oxygen species                                                                                      |    |
|                                         |                                    |                                                                                                       |          | -                                                            | 5 $\mu$ g/mL                                               | Higher GC apoptotic rate                                                                                               |    |
|                                         |                                    |                                                                                                       |          | -                                                            | 5 $\mu$ g/mL                                               | Higher protein expression wnt                                                                                          |    |
|                                         |                                    |                                                                                                       |          | -                                                            | 1 $\mu$ g/mL                                               | Higher expression of p- $\beta$ -catenin                                                                               |    |
| PS                                      | 0.5 $\mu$ m, 4 $\mu$ m, 10 $\mu$ m | Mice                                                                                                  | 28 days  | -                                                            | 100 $\mu$ L (10 mg/L)                                      | Declined sperm quality and testosterone level                                                                          | 58 |
|                                         |                                    |                                                                                                       |          | 100 $\mu$ L (10 mg/L) (0.5 $\mu$ m)                          | 100 $\mu$ L (10 mg/L) (4 $\mu$ m, 10 $\mu$ m)              | Decreased weight                                                                                                       |    |
|                                         |                                    |                                                                                                       |          | -                                                            | 100 $\mu$ L (10 mg/L)                                      | Increased testicular inflammatory factor                                                                               |    |
|                                         |                                    |                                                                                                       |          | -                                                            | 100 $\mu$ L (10 mg/L)                                      | Disrupted integrity of the blood-testis barrier                                                                        |    |
| PE                                      | 200-9900 nm                        | Inverted triple culture transwell model of healthy and inflamed intestine (Caco-2/HT29-MTX-E12/THP-1) | 24 hours | -                                                            | 50 $\mu$ g/cm <sup>2</sup> (healthy and inflamed cultures) | Increased lactate dehydrogenase level                                                                                  | 65 |
|                                         |                                    |                                                                                                       |          | 50 $\mu$ g/cm <sup>2</sup> for inflamed culture              | 50 $\mu$ g/cm <sup>2</sup> for stable healthy culture      | Increased inflammatory cytokine, IL-8                                                                                  |    |
|                                         |                                    |                                                                                                       |          | 50 $\mu$ g/cm <sup>2</sup> for healthy and inflamed cultures | -                                                          | Pro-inflammatory cytokines IL-1 $\beta$ , IL-6 and TNF- $\alpha$                                                       |    |
|                                         |                                    |                                                                                                       |          | 50 $\mu$ g/cm <sup>2</sup> for healthy and inflamed cultures | -                                                          | DNA damage                                                                                                             |    |
| Fresh (f-) and weathered (w-) PP and PS | 100 $\mu$ m                        | Caco-2 cells                                                                                          | 24 hours | 20000 particles/mL                                           | -                                                          | Lactate dehydrogenase level                                                                                            | 63 |
|                                         |                                    |                                                                                                       |          | 20000 particles/mL                                           | -                                                          | Levels of IL-6, IL-8 and TNF- $\alpha$                                                                                 |    |
|                                         |                                    | HepG2 cells                                                                                           |          | 20000                                                        | -                                                          | Lactate dehydrogenase                                                                                                  |    |

|    |           |                  |         |                                                  |                                                                          |                                                                                  |    |
|----|-----------|------------------|---------|--------------------------------------------------|--------------------------------------------------------------------------|----------------------------------------------------------------------------------|----|
|    |           |                  |         | particles/mL                                     |                                                                          | level                                                                            |    |
|    |           |                  |         | 20000 particles/mL                               | -                                                                        | Levels of IL-8 and TNF- $\alpha$                                                 |    |
|    |           |                  |         | -                                                | 5000 f-PS particles/mL (lack dose-dependence)                            | Increased level of IL-6                                                          |    |
|    |           | THP-1 macrophage |         | 20000 w-PP particles/mL                          | 20000 f-PP particles/mL; 5000 f-PS particles/mL; 10000 w-PS particles/mL | Increased lactate dehydrogenase level                                            |    |
|    |           |                  |         | 20000 w-PP particles/mL; 20000 w-PS particles/mL | 5000 f-PP particles/mL; 5000 f-PS particles/mL                           | Increased IL-1 $\beta$                                                           |    |
|    |           |                  |         | -                                                | 5000 particles/mL                                                        | Increased MIP-1 $\beta$                                                          |    |
| PS | 5 $\mu$ m | Mice             | 35 days | -                                                | 100 $\mu$ g/L (0.6-0.7 $\mu$ g/day)                                      | Decreased ratio of live sperm in epididymis to total sperm number                | 70 |
|    |           |                  |         | -                                                | 10 mg/L (60-70 $\mu$ g/day)                                              | Increased sperm malformation                                                     |    |
|    |           |                  |         | -                                                | 100 $\mu$ g/L (0.6-0.7 $\mu$ g/day)                                      | Increased expression of NF- $\kappa$ Bp65 and p-NF- $\kappa$ Bp65 nuclear factor |    |
|    |           |                  |         | 1000 $\mu$ g/L (6-7 $\mu$ g/day)                 | -                                                                        | Expression of p-I $\kappa$ B $\alpha$                                            |    |
|    |           |                  |         | -                                                | 1000 $\mu$ g/L (6-7 $\mu$ g/day)                                         | Reduced expression of p-I $\kappa$ B $\alpha$ nuclear factor                     |    |
|    |           |                  |         | -                                                | 1000 $\mu$ g/L (6-7 $\mu$ g/day)                                         | Increased IL-1 $\beta$                                                           |    |
|    |           |                  |         | -                                                | 100 $\mu$ g/L (0.6-0.7 $\mu$ g/day)                                      | Increased IL-6                                                                   |    |
|    |           |                  |         | -                                                | 10 mg/L (60-70 $\mu$ g/day)                                              | Increased TNF $\alpha$                                                           |    |
|    |           |                  |         | -                                                | 1000 $\mu$ g/L (6-7 $\mu$ g/day)                                         | Decreased levels of Nrf2 and HO-1                                                |    |
|    |           |                  |         | -                                                | 100 $\mu$ g/L (0.6-0.7 $\mu$ g/day)                                      | Increased pro-apoptotic protein to anti-apoptotic protein ratio (Bax/Bcl2)       |    |



|               |                                                                                                                            |              |          |                 |                                                                                                                                                                                                                                 |                                                                                          |    |
|---------------|----------------------------------------------------------------------------------------------------------------------------|--------------|----------|-----------------|---------------------------------------------------------------------------------------------------------------------------------------------------------------------------------------------------------------------------------|------------------------------------------------------------------------------------------|----|
| PE            | 30-140 $\mu\text{m}$                                                                                                       | Caco-2 cells | 48 hours | -               | 1000 mg/L                                                                                                                                                                                                                       | Decreased cell viability                                                                 | 66 |
|               |                                                                                                                            |              |          | -               | 100 mg/L                                                                                                                                                                                                                        | Increased intracellular ROS                                                              |    |
|               |                                                                                                                            |              |          | -               | 100 mg/L                                                                                                                                                                                                                        | Reduced mitochondrial membrane potential                                                 |    |
|               |                                                                                                                            |              |          | 1000 mg/L       | -                                                                                                                                                                                                                               | Lactate dehydrogenase level                                                              |    |
| PS            | 20 nm, 40 nm, 1 $\mu\text{m}$ carbonylated PS; sulfate- and amine-modified 100 nm PS; sulfate-modified 10 $\mu\text{m}$ PS | HepaRG cells | 24 hours | -               | $2.5 \times 10^{11}$ (100 nm sulfate (-) and 100 nm neutral PS); $5 \times 10^{11}$ (100 nm amino (+) PS); $2.5 \times 10^{12}$ (40 nm carboxy (--) PS surface/mL; $1.5 \times 10^{11}$ (20 nm carboxy (--) PS (dose-dependent) | Slightly increased caspase-3 activity                                                    | 73 |
|               |                                                                                                                            |              |          | -               | $2 \times 10^{11}$ (20 nm carboxy (--) PS (dose-dependent); $5 \times 10^{11}$ (100 nm amino (+) PS)<br><br>Unit = $\mu\text{m}^2$ particle surface/mL                                                                          | Increased caspase-9 activity indicating apoptosis induction                              |    |
| UV-treated PS | 1.0-1.9 $\mu\text{m}$                                                                                                      | Caco-2 cells | 24 hours | -               | 500 $\mu\text{g/mL}$ (6-hour and 12-hour UV irradiation)                                                                                                                                                                        | Decreased cell viability                                                                 | 44 |
|               |                                                                                                                            |              |          | -               | 500 $\mu\text{g/mL}$ (6-hour and 12-hour UV irradiation)                                                                                                                                                                        | Increased lactate dehydrogenase level, which implies plasma membrane damage              |    |
| PS            | 50 nm                                                                                                                      | Mice         | 30 days  | 10 mg/kg        | -                                                                                                                                                                                                                               | Body weight                                                                              | 60 |
|               |                                                                                                                            |              |          | 10 mg/kg        | -                                                                                                                                                                                                                               | Anxiety-like behavior                                                                    |    |
|               |                                                                                                                            |              |          | 10 mg/kg        | -                                                                                                                                                                                                                               | Locomotor function                                                                       |    |
|               |                                                                                                                            |              |          | 10 mg/kg        | -                                                                                                                                                                                                                               | Relative mRNA expression of IL-1 $\beta$ , IL-6, Tnf- $\alpha$ (intestinal inflammation) |    |
|               |                                                                                                                            |              |          | 10 mg/kg (Muc2) | 10 mg/kg (Tff3 and                                                                                                                                                                                                              | Relative mRNA                                                                            |    |

|    |           |      |                |          |                   |                                                                                                               |    |
|----|-----------|------|----------------|----------|-------------------|---------------------------------------------------------------------------------------------------------------|----|
|    |           |      |                |          | Klf3)             | expression of Muc2, Tff3 and Klf3 (intestinal mucus secretion)                                                |    |
|    |           |      |                | 10 mg/kg | -                 | Relative mRNA expression of Nfe212, Hmox-1, Txn-1, Txn-2 (oxidative stress)                                   |    |
|    |           |      |                | 10 mg/kg | -                 | Relative mRNA expression of Zo-1, Cldn3, Cldn7, Occludin (intestinal epithelial cell tight junction proteins) |    |
|    |           |      |                | 10 mg/kg | -                 | Inflammation and oxidative stress of cortex                                                                   |    |
|    |           |      |                | 10 mg/kg | -                 | Inflammation and oxidative stress of lung                                                                     |    |
|    |           |      |                | 10 mg/kg | -                 | Inflammation and oxidative stress of liver                                                                    |    |
|    |           |      |                | 10 mg/kg | -                 | IL-1 $\beta$ , IL-6 and TNF- $\alpha$ in serum                                                                |    |
| PS | 1 $\mu$ m | Mice | 33 days        | -        | 80 $\mu$ g/kg/day | Transcriptional change in colon                                                                               | 71 |
|    |           |      |                | -        | 80 $\mu$ g/kg/day | Mild inflammatory signature in colon                                                                          |    |
|    |           |      | 33 and 41 days | -        | 80 $\mu$ g/kg/day | Increased inflammation and increased leukocytes                                                               |    |
